# Supplementary material for: Protocol for a Multi-Level Policy Analysis of Non-Communicable Disease Determinants of Diet and Physical Activity: Implications for Low- and Middle-Income Countries in Africa and the Caribbean
Source: Int J Environ Res Public Health. 2021 Dec 10;18(24):13061. doi: 10.3390/ijerph182413061 (PMC8700960; doi:10.3390/ijerph182413061)
Supplement: Supplementary file 1 [file ijerph-18-13061-s001.zip › Table S1 Template for Codebook development.xlsx]

## Sheet: Sheet1
	TEMPLATE FOR CODE BOOK DEVELOPMENT ACROSS SUBSTUDIES											Policy content -SPECIFIC TO DIET/NUTRITION (what should be done?)	With these, it would be good to at an initial level note which ones are included (e.g. just tick) - but as we further the analysis, or if we note differences in approach, we could extract excerpts of text. Include ref to all policies relevant to the food environment, regardless of whether NCDs are mention, but note purpose of policy where possible												Framing and beliefs Specific to Diet	Here it would be ideal to extract text, but comments are also fine (e.g. 'emphasis on individual responsibilty')			Framing and beliefs SPECIFIC to PHYSICAL ACTIVITY					Resourcing-BOTH DIET AND PA	Excerpts or comments as approptiate	Governance	Excerpts or comments as approptiate
Type of policy document	Title	Year endorsed	Stated purpose of the document ( In particular note if a focus on NCD and in where present, if a fcus on diet and PA)	Ministry/ies responsible	Other Ministries named	Why are NCDs a problem? ( how is this framed in the policy doc)	Who should take action on NCDs? (Specific proposals)	Main policy objectives (Focus and angle)	Target population (s)(How construed)	Specific reference to Global policy intentions, such as WHO Best Buys	Accompanying implementation plans and related timeframes	Marketing	Reformulation	Production of healthy food	Processing/manufacturing of healthy food	Retail of healthy food	Public procurement of healthy food	Healthy catering guidelines	Trade policy	Fiscal policy	Linking agriculture to food provision	Social marketing and health promotion campaigns	Nutrition labelling	Nutrition education	What are the causes of diet-related NCDs (i.e. beliefs about the problem)?	What is the role of the state in regulating markets?	Proposals for the most effective policy response?		What are the causes of PA-related NCDs, beliefe about the problem	What is the role of the state, and at which level, to provide infrastructure and architecture to promote PA	Specific proposals about transport	Specific proposals about urban planning (inlc housing)		What commitments re resourcing are being made?	Where should the money come from?	Who should coordinate a response?	Which sectors are most important?	Reference to regional or international commitments?
Whole of government/society
Intersectoral with explicit focus on NCD ( diet &/or PA in particular)
Intersectoral -NCD sensitive ( diet &/or PA in particular)
Sector-specific with explicit focus on NCD ( diet &/or PA in particular)
Health
Education
Agriculture
Trade
Commerce
Finance
Urban planning
Sector-specific -NCD sensitive ( diet &/or PA in particular)
Health
Agriculture
Trade
Commerce
Finance
Urban planning

## Sheet: Sheet2
NCD Roadmap
Food security
Tonga meeting
At these meetings for the key plans- who attended?
Actors involved in the outcome document, strategy, communique
FAO	The overall goal of FAO assistance to the Pacific is improved food security and income earning opportunities in the 13 countries and one territory covered by this framework. The framework establishes four priority areas across the region where FAO assistance will be focused. These are: 1. Evidence-based Policy and Strategic Planning 2. Food and Nutrition Security Resilient to the Impacts of Disas…
